# 1 Noise-driven cell differentiation and 2 the emergence of spatiotemporal 3 patterns

4 Hadiseh Safdari<sup>1,‡</sup>, Ata Kalirad<sup>1,‡</sup>, Cristian Picioreanu<sup>2</sup>, Rouzbeh Tusserkani<sup>3</sup>,  
5 Bahram Goliaei<sup>4</sup>, Mehdi Sadeghi<sup>1,5\*</sup>

\*For correspondence:  
[sadeghi@nigeb.ac.ir](mailto:sadeghi@nigeb.ac.ir) (MS)

†These authors contributed  
equally to this work

6 <sup>1</sup>School of Biological Science, Institute for Research in Fundamental Sciences (IPM),  
7 Tehran, Iran; <sup>2</sup>Department of Biotechnology, Faculty of Applied Sciences, Delft  
8 University of Technology, Delft, The Netherlands; <sup>3</sup>School of Computer Science,  
9 Institute for Research in Fundamental Sciences (IPM), Tehran, Iran; <sup>4</sup>Institute of  
10 Biochemistry and Biophysics, University of Tehran, Tehran, Iran; <sup>5</sup>National Institute of  
11 Genetic Engineering and Biotechnology (NIGEB), Tehran, Iran

---

13 **Abstract** One of the major transitions in evolution is the step from unicellularity into the brave  
14 new world of multicellularity. To understand this feat, one has to fathom two main characteristics  
15 of multicellular organisms: differentiation and self-organization. Any explanation concerning this  
16 major transition should involve mechanisms that can simultaneously explain the marvelous  
17 intricacies manifest in the aforementioned characteristics, and an account of the evolution of  
18 such traits. Here we propose a noise-driven differentiation (NDD) model. The reliance on noise,  
19 in place of a more mechanistic approach, makes the NDD model a more suitable approach to  
20 explain differentiation and self-organization. Furthermore, our model sheds some light on the  
21 possible evolutionary origins of these biological innovations. To test the NDD model, we utilize a  
22 model of cell aggregation. The behavior of this model of cell aggregation is in concert with the  
23 NDD model.

---

## 25 Introduction

26 The traditional idea of a living cell where every organelle, every reaction, and every interaction is  
27 part of a clock-like order has long been shattered by the understanding that biological systems  
28 usually struggle to function in noisy environments. One might consider life to be an uphill battle  
29 against pandemonium, where disarray is the norm and spheres of order – i.e., biological systems –  
30 are rarities that are unlikely to appear in the first place. In this view, noise is a nuisance that natural  
31 selection always attempts to eliminate. It is for the same reason that selection cannot increase the  
32 fidelity of replication beyond a certain threshold; the biological cost of increasing fidelity simply  
33 becomes too high at that point (*Kimura, 1967*).

34  
35 A different view has recently gained some grounds (*Balázsi et al., 2011; Chalancon et al., 2012;*  
36 *Huang, 2009; Losick and Desplan, 2008*). In this view, biological systems that regulate and utilize  
37 the noise can have higher fitness under certain circumstances. Had biological systems been utterly  
38 deterministic, adaptation – i.e., the emergence of a new phenotype or a change in the gene expres-  
39 sion pattern to utilize a new food source – would have been impossible without the emergence  
40 of new mutations. In reality, noise in the cell can result in beneficial non-genetic diversity in oth-

41 erwise genetically homogenous populations – e.g., cyanobacteria (*Wolk, 1996*) and yeast (*Paliwal*  
42 *et al., 2007*). But what mechanism can account for the presence of phenotypic diversity amongst  
43 daughter cells that are genetic clones of each other? Is it possible for a stochastic mechanism to  
44 explain the non-genetic diversity? Even if such stochastic explanation were offered, how could this  
45 explanation possibly account for the ordered spatiotemporal patterns in spatially-extended cell  
46 population?

47  
48 The model of cell differentiation proposed in this work, henceforth referred to as the noise-  
49 driven differentiation (NDD) model, accounts for the peculiarities of this biological phenomenon  
50 by weaving noise into an explanation of cellular behaviors at the time of differentiation. While on  
51 the surface, this approach might seem lofty and even radical, the model discussed in this paper is  
52 parsimonious when it comes to the mechanisms requisite for its operation. The NDD model rests  
53 on 8 components (Table 1). Some can be regarded as facts, based on reliable empirical evidence  
54 from biological systems (components #1 and #2), while others are more accurately described as  
55 assumptions (components #3 – 8).

56  
57 There is a plethora of phenomena within a cell that can contribute to its intrinsic noise – e.g.,  
58 transcription regulation, transcription factor binding to the DNA, RNA processing in eukaryotes,  
59 translation, post-translational modifications, protein complex formation, protein and RNA degra-  
60 dation, etc. Single-cell level measurements of gene expression further cements the notion that  
61 cells are intrinsically noisy when it comes translating its genotype into phenotype (*Sanchez and*  
62 *Golding, 2013*). The displacement of the division plane relative to the middle of the cell can result  
63 in an unequal distribution of cell content between the daughter cells, even if molecules are ho-  
64 mogeneously distributed within the cell. In fact, the central role of asymmetric cell division in the  
65 diversification of cells, from *Drosophila* to mammals has been known for many years (*Jan and Jan,*  
66 *1998; Betschinger and Knoblich, 2017*). The components #1 – 2 is an acknowledgement of the role  
67 stochasticity in living systems based on these observation.

68  
69 Thus far, two types of solutions to the problem of cell differentiation have been proposed: the  
70 first category consists of models that rely on cell-cell communication (reviewed in *Wolpert (2011)*)  
71 and the second category relies on asymmetric cell division (reviewed in (*Rudel and Sommer, 2003*)).  
72 The research project within the confines of the former category is mainly a quest to find the build-  
73 ing blocks of the apparatus that makes the specific kind of cell-cell communication needed for cell  
74 differentiation. The latter category, on the other hand, presumes the asymmetric cell division to re-  
75 sult in differentiation. Hitherto unknown and often complicated mechanisms have been proposed  
76 to explain the asymmetric distribution of fate-determining factors during cell division (*Morrison*  
77 *and Kimble, 2006; Clevers, 2005*). Both categories are quintessentially mechanistic in nature, since  
78 they rely on mechanical interactions at the cellular level. While we agree with the importance of  
79 the asymmetric cell division, it seems to us that a stochastic model of differentiation, like the NDD  
80 model, negates the need for new mechanisms. In this model, we adopt the view that stochas-  
81 tic processes result in differentiated cells due to the distribution of key proteins, instead of cells  
82 differentiating by receiving signals after they are born (component #3).

83  
84 The component #4 is based on the idea that characteristics of a cell can be changed by a switch  
85 (Not a very recent idea, e.g., *Novick and Weiner (1957)*). The notion that cell fate is determined  
86 by a switch is best illustrated by the now famous case of the  $\lambda$  phage. The process by which the  
87 phage decides to integrate into the host's genome – i.e., lysogenic – or to replicate copies of itself  
88 in the cell until it bursts open – i.e., lytic – can be explained by a stochastic switch which makes that  
89 portentous decision in a probabilistic fashion, while taking into account the presence of certain  
90 key factors (*Ptashne, 2004*). One can assume that the bias of this switch is determined by the inter-  
91 actions of its building blocks (component #5). For example, upon infecting bacterial cells,  $\lambda$  phage

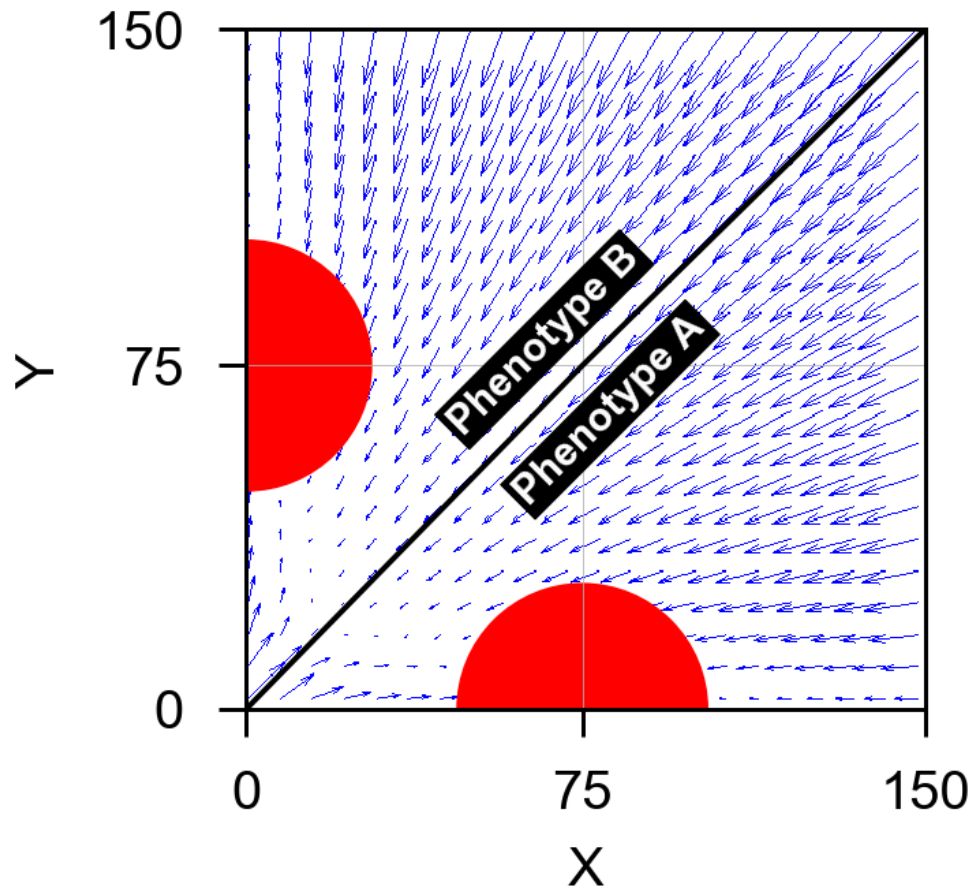

**Figure 1.** The phase-portrait diagram for the NDD model (based on Eq 1). In a bistable switch, two attractors (red semicircles) and, consequently, two phenotypes are available: *A* and *B*. The likelihood of a switch choosing state *A* over *B* depends on the number of the transcription factor associated with state *A* ( $TF_X$ ) relative to the number of the transcription factor associated with state *B* ( $TF_Y$ ), as well as the noise in its environment. The parameters used to generate this and the following figure are as follows:  $n = 2$ ,  $\beta = 0.1$ , protein half-life = 10min, and protein dissociation constant = 10. Unless noted otherwise, these parameters are used in all the subsequent figures.

**Table 1.** The components of the NDD model.

| # | Component                                                                                                                                                                     | Justification                                                                                                                                                                                                                                                                                                                                                |
|---|-------------------------------------------------------------------------------------------------------------------------------------------------------------------------------|--------------------------------------------------------------------------------------------------------------------------------------------------------------------------------------------------------------------------------------------------------------------------------------------------------------------------------------------------------------|
| 1 | Noise, resulting from a plentitude of sources, is an inseparable part of a living cell.                                                                                       | Based on the observed effect of noise on the processes in living cells, from microbes to mice (e.g., see ( <i>Kepler and Elston, 2001; Ozbudak et al., 2002; Elowitz et al., 2002; Maamar et al., 2007; Chang et al., 2008</i> )).                                                                                                                           |
| 2 | Stochastic partitioning of cytoplasm during cell division and the random distribution of molecules in the cytoplasm determine the cytoplasmic contents of the daughter cells. | Variation in the position of cell-division plane is a biological fact (reviewed in <i>Margolin (2000); Monahan et al. (2014); Pickett-Heaps et al. (1999); Wu and Tzanakakis (2012); Bradshaw and Losick (2015)</i> ), and its effect on the diversification of cells is well-known (e.g., see <i>Jan and Jan (1998); Betschinger and Knoblich (2017)</i> ). |
| 3 | The fate of a cell is determined when it is born.                                                                                                                             | Based on the assumption that cell-fate-determining factors are in small numbers in a cell and the stochastic distribution of these factors during cell division determines the fate of the newly-born daughter cells.                                                                                                                                        |
| 4 | Cell fate is determined by a switch.                                                                                                                                          | Genetic switches have been observed in a variety of taxa (reviewed in <i>Balázsi et al. (2011)</i> ), and has been proposed as a model to account for cell differentiation (e.g., see <i>Perez-Carrasco et al. (2016)</i> ).                                                                                                                                 |
| 5 | The interaction between the building blocks of the switch determines its bias.                                                                                                | Our assumption based on our knowledge of well-known genetic switches, such as $\lambda$ phage (see <i>Cortes et al. (2018)</i> ).                                                                                                                                                                                                                            |
| 6 | All the information needed to construct the switch is genetic.                                                                                                                | We assume that, while stochasticity is what drives the decision made by the switch, the information necessary to construct the switch is encoded in the genetic content of a cell.                                                                                                                                                                           |
| 7 | The robustness of the switch is the result of a complex network of interactions.                                                                                              | Our assumption based on <i>Sharifi-Zarchi et al. (2015)</i> .                                                                                                                                                                                                                                                                                                |
| 8 | Cell fate is influenced by its location and its environment.*                                                                                                                 | We assume the the switch determining cell fate should, in addition to being swayed by the intrinsic factors, be influenced by its neighbors.                                                                                                                                                                                                                 |

\* This component is necessary for the ordered spatiotemporal patterns in cell population.

92 proceeds to lyse the host, but as the concentration of CII protein increases, so does the likelihood  
 93 of the reactions suppressing the activation of *pR* and *pL* promoters, relevant to the onset of the  
 94 lytic trajectory, which in turn, tilts the scale away from lysis towards lysogeny (*Cortes et al., 2018*).  
 95 We propose that phenotypic diversity arises from the effect of the noise on a genetic circuit that  
 96 exhibits a switch-like behavior (component #6). The notion that different phenotypes are produced  
 97 from the same genotype as a consequence of noise is widely observed in nature (reviewed in (*Vogt,*

98 **2015))**

99

100 How robust can a fate-determining toggle switch in the face of new mutations? *Sharifi-Zarchi*  
101 *et al. (2015)* took advantage of the gene expression profiles of 442 mouse embryonic cells to con-  
102 struct a network of key transcription factors (TFs). While a regulatory circuit with two TFs could  
103 explain differentiation, They reasoned that such a simple switch is susceptible to mutations. To  
104 construct a robust switch, they built a circuit with two clusters of TFs with correlated expressions.  
105 Expectedly, the alternative switch, which involved more interactions, was much more robust. We  
106 would expect different levels of robustness for a switch, given its biological importance in evolution  
107 (component #7).

108

109 The components #1-7 are sufficient to generate a population of cells with different proportions  
110 of two phenotypes (Fig 1). While this kind of fate determination is adequate vis-à-vis primitive cells  
111 with no organization, it does not allow the emergence of multicellularity. An additional compo-  
112 nent is necessary to explain this major transition from mere phenotypic differentiation to ordered  
113 spatiotemporal patterns in the body of a multicellular organism. For self-organization to occur,  
114 we assume that the toggle switch determining cell fate should, in addition to being swayed by the  
115 intrinsic factors, be influenced by its neighbors (component #8).

116

117 To test the general veracity of the NDD model, we used a simple model of cell aggregation. In  
118 this model, a simple switch is defined that can switch between phenotypes, *A* and *B*.

## 119 **Results**

120 The overall behavior of the cell aggregation model demonstrates the principles of our framework –  
121 that is, the stochasticity results in phenotypic heterogeneity as the population grows in size (movie  
122 S1). To further illustrate how each source of noise affects the cell differentiation, we focused on  
123 each source separately in the simulations.

### 124 **The stochastic positioning of division plane and the stochastic distribution of key** 125 **proteins affect differentiation**

126 One source of intrinsic stochasticity stems from the random positioning of the division plane. This  
127 factor would disproportionately influence the number of molecules that exist in low numbers  
128 within cytoplasm. In this work, it has been postulated that the determinants of cell fate are low  
129 in numbers and thus, greatly affected by stochasticity.

130

131 To demonstrate this phenomenon, the position of the division plane was allowed to vary with  
132 respect to the mid plane of the cell. Starting from a cell with phenotype *A*, in which the protein  
133 *X* is dominant, the population heterogeneity –i.e., emergence of phenotype *B*– was traced over 12  
134 generations. The results are shown in Fig 2. When the division plane is situated in the middle of  
135 the cell, and the TFs are relatively abundant, very few cells differentiate. As the variance in the cell-  
136 division plane increases, so does the proportion of *B* cells. This phenomenon is dependent on the  
137 number of proteins, since such bias is more pronounced when the number of proteins is relatively  
138 low. In fact, with large numbers of TFs in a cell, it will be more likely for its daughters to have almost  
139 the same density of TFs as their mother. Thus, they will be in the same domain as the mother in the  
140 phase space, and their fates will be identical to hers. This can be seen clearly in the lower curves in  
141 Fig 2. However, for low copy numbers of TFs, the difference between TF numbers in two daughter  
142 cells becomes more prominent and can even lead to different cell fates. Therefore, it is possible  
143 to have heterogeneity in the population in the absence of any other noise, i.e., cells with low TF  
144 numbers are heterogeneous even with no variance in division-plane displacement (Fig 2a). Adding  
145 spatial fluctuation to the distribution of TFs within a cell increases the chance of differentiation,

146 since in this case, in addition to the noise from the positioning of division plane, the key proteins  
147 are stochastically distributed as well (Fig 2b).

### 148 **Signaling can create spatial order**

149 In the cell aggregation model, *B* cell can release signals in the environment. These signals diffuse  
150 at a slow rate and, consequently, have a very short radius of influence. The absorption of these  
151 signals by other cells in the population affects the number of proteins involved in the switch –  
152 that is, switching to the phenotype *B* during cell division becomes more likely (Fig 3). When this  
153 environmental signaling is added to the population, the cells organize in a non-random fashion, a  
154 stark contrast to the random heterogeneity observed before (Movie S2).

155  
156 Fig 4 represents a visual understanding of the results from the NDD model. It shows the bac-  
157 terial community in a 2-dimensional simulation area after more than 8 generations. In Fig 4a, the  
158 variance in the stochastic positioning of the division plane increases from left to right. It can be  
159 seen that the heterogeneity in the population increases as well by the presence of new pheno-  
160 types (cells in orange). In Fig 4b, development of an organized community as a result of signaling  
161 molecules is apparent (group of orange cells). The organization observed will increase over time  
162 and the community of orange cells will develop (Movie S3).

### 163 **Discussion**

164 Molecular processes in the cell are noisy events that result in varying degrees of heterogeneity.  
165 Taming this inherent noise is vital for the emergence and the continuation of life. In fact, life can  
166 be characterized as a system with the capacity to control noise. The phenotype of a cell is gener-  
167 ally stable, but during cell division, this cell can produce daughter cells with different phenotypes  
168 via symmetric or asymmetric cell division. The resulting non-genetic phenotypic diversity is a way  
169 to achieve adaptation in a fluctuating environment by producing phenotypically diverse offspring  
170 without any need for genetic change. Given the variety of sources of noise, the cell fate determina-  
171 tion can be a stochastic process. One can imagine a few genes involved in cell fate determination,  
172 where the noise in the cell affects the proportion of daughter cells born with a certain pheno-  
173 type. The ability to change the phenotypic proportion of daughter cells via a stochastic mechanism,  
174 which is also tunable, is a superb strategy to outcompete rivals bereft of such gift.

175  
176 Given the prominence of noise in living cell, we argue that the NDD model can provide a satis-  
177 factory explanation of how organization can emerge from noise. Proposing a stochastic model of  
178 cell differentiation is not an entirely novel concept, e.g., see *Suzuki et al. (2011)*; *Yamagishi et al.*  
179 *(2016)* as examples of an impressive body of work produced by Kunihiko Kaneko and his colleagues  
180 on this subject and *Kupiec (1997)*; *Paldi (2003)* as similar proposals regarding the possible role of  
181 stochasticity in generating phenotypic diversity. We argue that our approach differs from theirs  
182 and similar ideas in certain important aspects: firstly, our model assumes that cell fate is deter-  
183 mined when the cell is born, and secondly, that stochastic fluctuations in the cell, and the effect  
184 of signals from neighboring cells in the multicellular case, drive the phenotype of the cell towards  
185 one attractor rather than another during cell division. This approach is in keeping with the recent  
186 emphasis on the importance and the prevalence of noise in biological functions, specifically cell  
187 fate (*Balázsi et al., 2011*; *Huang, 2009*; *Kittisopikul and Süel, 2010*). The model of cell aggregation  
188 used in this study allowed us to test all the components of the NDD model, barring components #6  
189 and #7, which demand through investigations of their own. This model of cell aggregation provides  
190 us with a relatively realistic depiction of the process that results in phenotypic differentiation in a  
191 population. We believe that, with few changes, the NDD model can be applied to other biological  
192 systems as well.

193

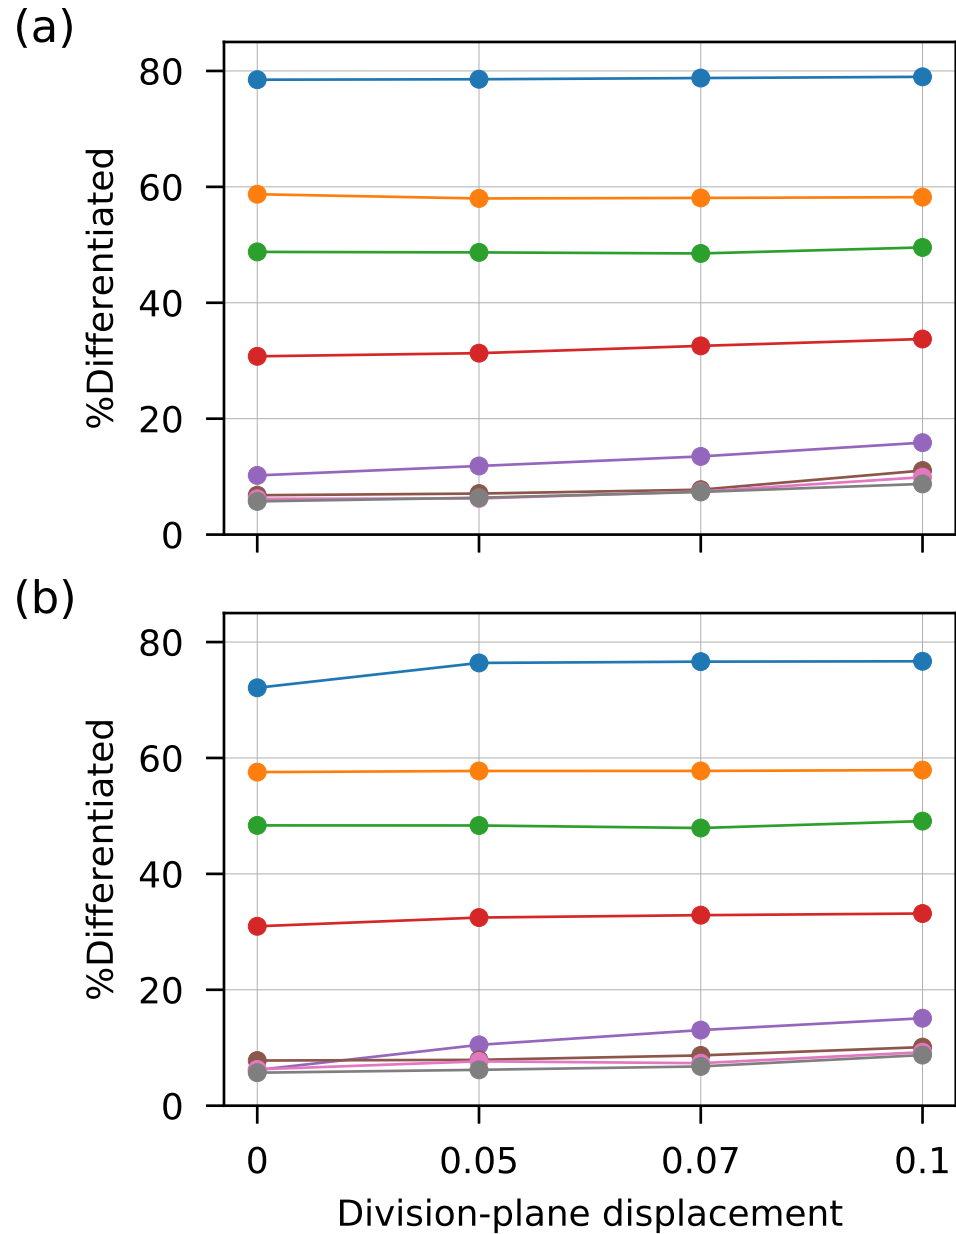

**Figure 2.** The stochastic positioning of the division plane and the random distribution of TFs in the cytoplasm, as intrinsic sources of noise, affect the none-genetic phenotypic diversity (component #2). The phenotypic diversity is represented by the proportion of cells with the phenotype  $B$  relative to the total number of cells in the population. In panel (a), the only source of noise is the stochastic positioning of the division plane, while panel (b) shows the phenotypic diversity as a result of both sources of noise. In each panel, the curves indicate different amounts of protein  $X$  in the mother cell; from top to bottom, respectively,  $X = 10, 15, 20, 25, 35, 45, 55, 100$ . The results are average over 100 replications. Error bars are 95%CI.

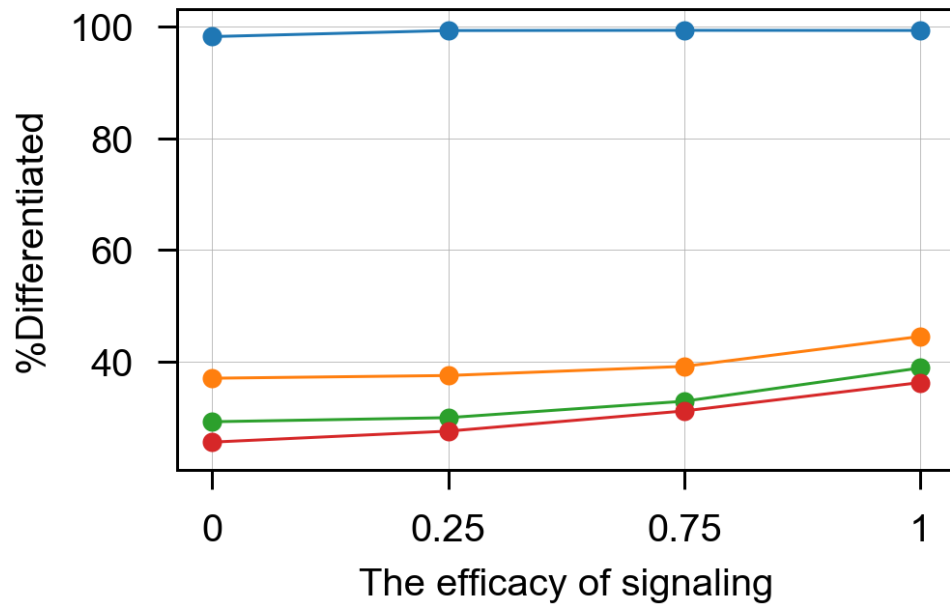

**Figure 3.** Adding signaling to the cell aggregation model results in higher none-genetic phenotypic diversity, compared to populations without signaling (as shown in Fig 4). The phenotypic diversity is represented by the proportion of cells with the phenotype  $B$  relative to the total number of cells in the population. The curves indicate different amounts of protein  $X$  in the mother cell; from top to bottom, respectively,  $X = 10, 35, 55, 100$ . It is fascinating to notice how the lowest number of TFs ( $X = 10$ ) results in total differentiation. The efficacy of signaling is defined as follows: if in the position of a cell with phenotype  $A$ , the signal concentration exceeds the mean signal concentration, then this cell would have more chance of becoming a  $B$  cell. The results are average over 100 replications. Error bars are 95%CI.



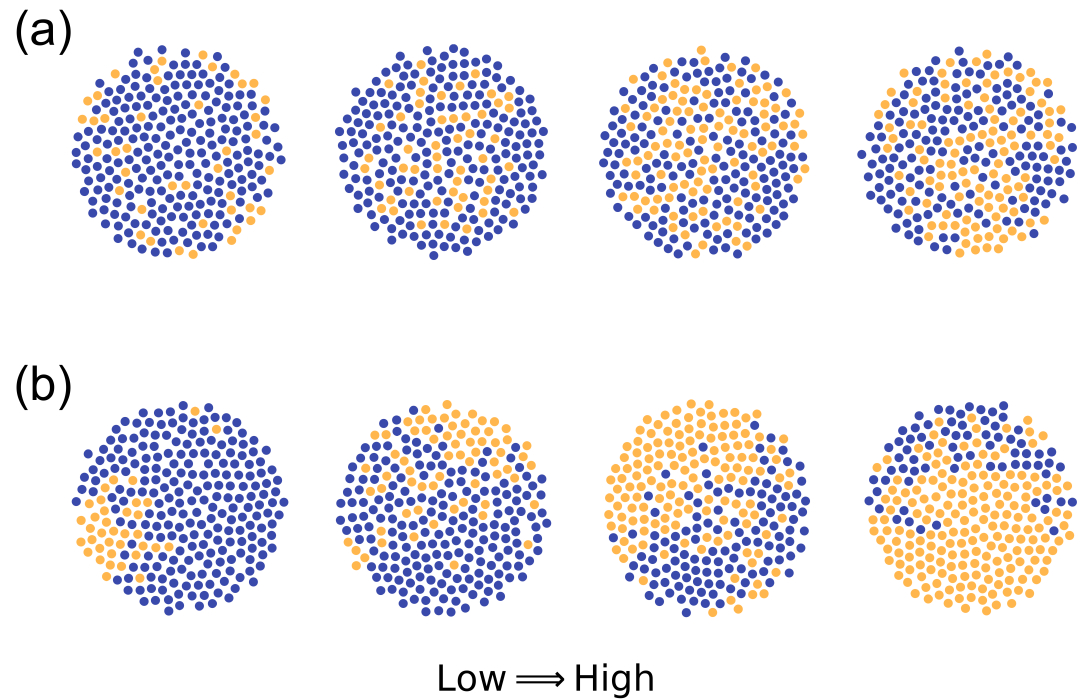

**Figure 4.** Population heterogeneity as a result of the noise in: (a) the number of TFs in the daughter cells or (b) the secretion of signals from the *B* cells. Both the number of TFs in (a) and the efficacy of signaling in (b) increases from left to right in this figure. The blue circles represent the *A* cells and the orange ones represent the *B* cells. Each aggregation is the final state of a single run of the stochastic model with the given parameters. The amount of protein *X* in the initial cell in each simulation was 35. The radius of the area of aggregation is  $100\mu\text{m}$ .

194 The ability of the cells to differentiate into different types was the crucial step that enabled the  
195 ancient solitary cells to leave the primordial soup behind and evolve into the vast array of special-  
196 ized cells we see today. As *Queller and Strassmann (2009)* point out, there are different shades  
197 of organismality –i.e., the ability for components to work together with little conflict among them–,  
198 each shade resulting from the affinity of the members of the system to cooperate versus the tempta-  
199 tion to cheat. We can sidestep the problem of conflict since in prokaryotic multicellularity, e.g.,  
200 biofilm, and in most truly multicellular eukaryotes, the cells are highly related, thus lowering the  
201 probability of cheating (*Ostrowski and Shaulsky, 2009*). Without tangible levels of conflict, multi-  
202 cellularity as a trait becomes patently advantageous. In their seminal work, Maynard Smith and  
203 Szathmáry (*Maynard Smith and Szathmáry, 1995*) considered two possible mechanisms to account  
204 for the emergence of cell differentiation: one relies on the presence of determinants that prohibit  
205 the stem cell to differentiate, and the other postulates the cell-cell contact as a mechanism that  
206 determines cell fate. While these suggestions account for how the multicellularity might be sus-  
207 tained, they do not explain how this major evolutionary transition could have occurred in the first  
208 place.

209  
210 It is easier for cell differentiation to evolve via the emergence of a switch, rather than the less  
211 plausible path that involves the evolution of a clockwork mechanism. According to the NDD model,  
212 the emergence of early stages of multicellularity only requires the evolution of a suitable switch –  
213 the rest of the necessary ingredients needed for the transition into self-organization is provided  
214 by the stochastic elements affecting the switch. The major transition from unicellularity to mul-  
215 ticellularity –i.e., from phenotypic diversity in a population to from an ordered and stable spatial  
216 heterogeneity– only requires one more step: the evolved switch should be simply affected by the  
217 signal(s) released by its neighbors (components #8). The spatial information received in this way  
218 would bias the switch such that the population-level organization is retained. It is tempting to pos-  
219 tulate a connection between the cell-differentiation switch, postulated in the NDD model, and the  
220 toggle switch used in quorum sensing in bacteria (*Hooshangi and Bentley, 2011*). Quorum sensing  
221 enables bacteria to regulate their phenotypes apropos of their neighbors and is more robust in a  
222 dense community (*Schluter et al., 2016*). It seems plausible to consider this type community-based  
223 phenotypic regulation as a precursor to similar switch-based mechanisms for cell differentiation  
224 in multicellular organisms.

225  
226 In their criticism of a noise-driven alternative to their model, *Suzuki et al. (2011)* considered it  
227 unlikely for a noise-driven model to maintain the exact levels of stochasticity needed to produce  
228 the desired proportion of differentiated cells to stem cells. In our view, this conclusion follows  
229 from a non-evolutionary perspective, since it is easy to imagine negative selection keeping a ge-  
230 netic switch just sensitive enough to result in a correct differentiation pattern vis-à-vis the biologi-  
231 cal fitness. Furthermore, if a switch is robust (component #7), then it will be able maintain its bias  
232 in the face of new mutations. *Suzuki et al. (2011)* also point out that a noise-driven model can  
233 only produce reversible differentiation. While the NDD model as described here only explains the  
234 phenotypic differentiation in prokaryotes, which is indeed reversible, it seems that changing the  
235 bi-stable switch to a tri-stable one could remedy this issue and explain the irreversibility of differ-  
236 entiation observed in eukaryotes, as it should increase the strength of attractors (*Ghaffarizadeh*  
237 *et al., 2014*).

238  
239 One of the quintessential aspects of the discussed model is its population-level perspective.  
240 Population-level thinking is one of the main points of the evolutionary theory, and bringing it to  
241 explain a cellular phenomenon can lead us to reap valuable insights. While a population of cells has,  
242 on average, certain properties relevant to differentiation, e.g., the mean number of key proteins,  
243 the average position of cell division plane, and etc., these average values do not tell the whole story.  
244 Instead, the variance in these values, i.e., the non-genetic variation present amongst individuals, is

245 the key to understand differentiation (as observed in studies such as *Chang et al. (2008); Moussy*  
246 *et al. (2017)*). This noise in the population is essentially the fuel that propels cellular differentiation,  
247 be it in the reversible differentiation in prokaryotes or the more complicated irreversible ones  
248 in higher organisms. We believe that this population-level vintage point is the necessary tool to  
249 understand this otherwise mind-boggling biological process. Without this perspective, the task of  
250 explaining such a seemingly fine-tuned process devolves into an attempt to come up with complex  
251 cellular interactions that would make climbing this improbable biological mountain feasible.

252  
253 The NDD model can be used wherever there is cell division and differentiation. The differenti-  
254 ating cell can be a prokaryotic one, able to divide into daughter cells with dissimilar, and reversible,  
255 phenotypes or a eukaryotic cell undergoing irreversible differentiation, without the need for one or  
256 a few complicated mechanisms. The transition from single cells into the brave new world of multi-  
257 cellular entities could have been the result of a mechanism very much akin to the NDD model. Such  
258 transition is possible because the bias of the switch can be affected by the neighboring cells. The  
259 NDD model paints a simple and elegant picture of differentiation and organization, from prokary-  
260 otes to eukaryotes. Our model is the logical extension of earlier ideas describing the role of stochas-  
261 ticity in phenotypic variation and the switch-like behavior of genetic circuits vis-à-vis differentiation  
262 and multicellularity (e.g., see *Nanjundiah (2016)*).

## 263 **Materials and methods**

264 In the cell aggregation model, the population is made up of cells, where each cell is a circular  
265 particle defined by its state variables – e.g., spatial position, size, and phenotype. The simulation  
266 geometry is a  $L \times L$  square and no flux boundaries. It is assumed that the relative amount of two  
267 key transcription factors,  $X$  and  $Y$ , controls the cell types; hence, in this model, a cell can have two  
268 phenotypes,  $A$  and  $B$ , as shown in Fig 1. The dominance of protein  $X$  leads to phenotype  $A$  and  
269 the dominance of protein  $Y$  results in phenotype  $B$ . In fact, a positive feedback loop influences  
270 the decision-making process. Two negatively coupled repressors mutually inhibit the expression  
271 of the gene that encodes the other repressor- i.e., a toggle switch (component #4). The rate of this  
272 mutual repression is represented in the form of a Hill function (*Gardner et al., 2000*). This positive  
273 feedback loop results in two stable steady states, hence implies non-linear approaches. Nonlinear  
274 differential equations govern the changes in the number of the repressor proteins,  $X$  and  $Y$  (Fig  
275 1);

$$\begin{aligned} \frac{dX}{dt} &= \frac{\beta}{1 + Y^n} - X \quad , \\ \frac{dY}{dt} &= \frac{\beta}{1 + X^n} - Y \quad . \end{aligned} \quad (1)$$

276 Here,  $\beta$  is the effective rate of protein synthesis and  $n$  is the Hill coefficient, which represents the  
277 degree of competence. The number of repressors are represented in the unit of their dissociation  
278 constants and time is rescaled by degradation rate of proteins (*Gardner et al., 2000; Carson and*  
279 *Cobelli, 2000; Elowitz and Stanislas, 2000*). Biologically-reasonable values were chosen for the pa-  
280 rameters used in our simulation such that Eq 1 would be bi-stable (following (*Gardner et al., 2000*)).  
281 This bistable regulatory network has two attractors corresponding to its stable steady states. Based  
282 on the amount of proteins at the cell division time, the cell can be in the domain of each attrac-  
283 tors, which determines its fate. Depending on the intensity of inhibitory effects of TFs (through the  
284 values of constants in the Hill function (*Gardner et al., 2000*)), the two domains of attractors could  
285 be equal or not (component #5). Fig 5 shows an example of such behavior in our cell aggregation  
286 model. Movie S1 shows the changes in the distribution of TFs in cells around their attractors during  
287 the emergence of generation 12.

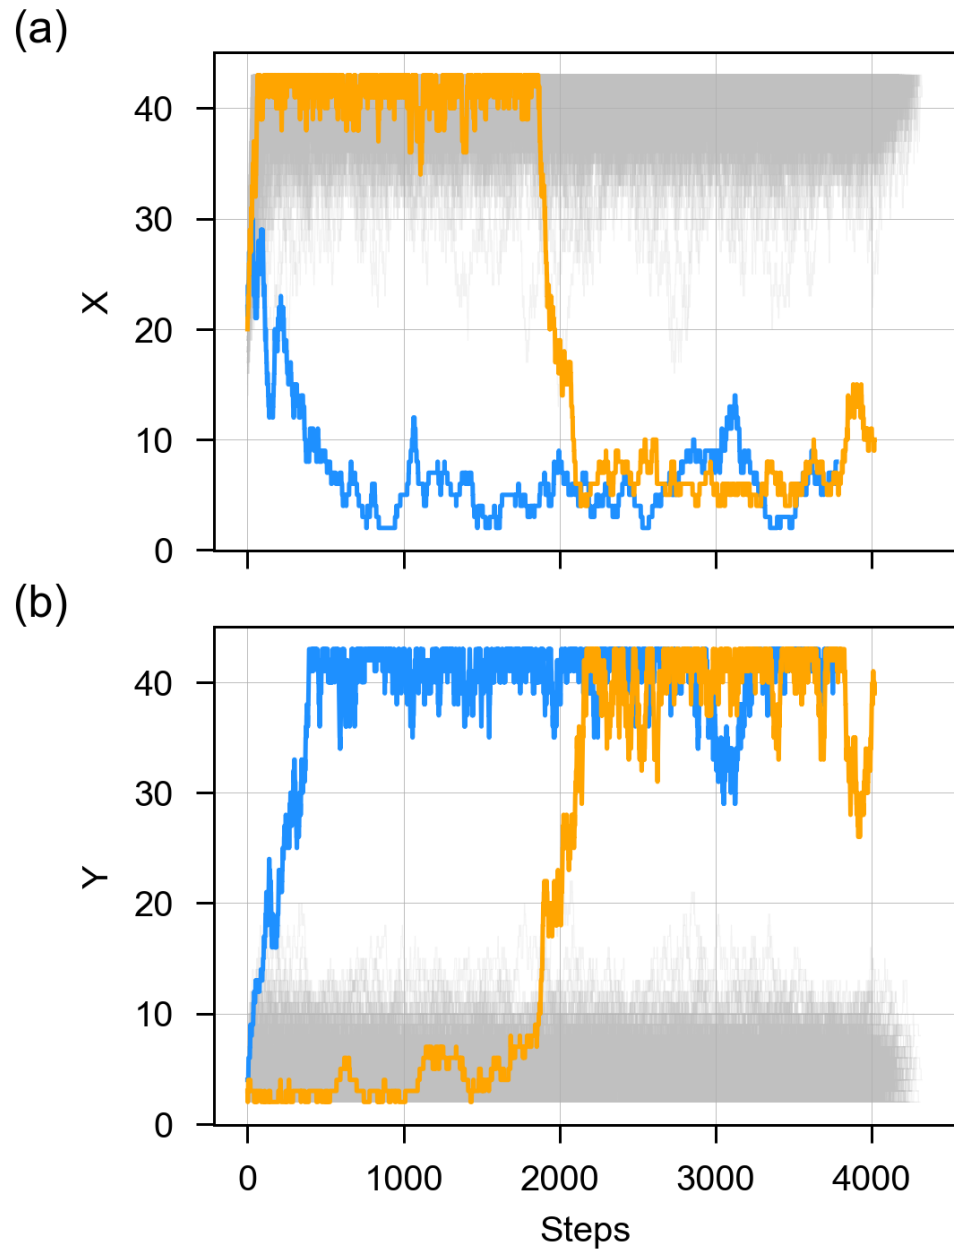

**Figure 5.** As cells grow, they stochastically explore the phase-plane around their attractor (as depicted in Fig 1) – i.e., over time the values for transcription factors  $X$  (a) and  $Y$  (b) for each cell fluctuate around the attractor that was determined when the cell was born. These fluctuations can result in a cell moving away from its original attractor towards the other attractor, such that it will be more likely for its daughters to have phenotypes different from their parent (the blue and orange trajectories). Results are based on 512 cells that descended from a single cell in the cell aggregation model. The trajectories follow the TFs counts during their lifespan.

## 288 Population growth algorithm

289 Simulation starts with a single cell with phenotype A. Each iteration in the simulation can be divided  
290 into four steps:

- 291 1. *Cell growth*: In this step, cells grow linearly in size. Simultaneously, the cytoplasmic content  
292 of each cell fluctuates in a stochastic fashion (component #1). The repressor proteins inside  
293 the cytoplasm interact with each other and their numbers,  $X$  and  $Y$ , are updated; however,  
294 because of their low copy numbers, instead of deterministic equations (Eq 1), their fluctua-  
295 tions are captured by the Gillespie algorithm (*Gillespie, 1977*) as a stochastic dynamics for  
296 discrete values. According to this algorithm, a probability of occurrence will be assigned to  
297 every biochemical reaction in the system. Every protein ( $X$  or  $Y$ ) is produced with a probabili-  
298 ty according to the first term on the right hand sides of the Eq 1. As the number of protein  
299  $X$  increases, it further represses the production of protein  $Y$  and vice versa. Every protein  
300 degrades according to its number. In every step of the Gillespie algorithm, one of the above  
301 reactions occurs and the time will be updated. The process continues until the number of  
302 proteins reaches a steady state.
- 303 2. *Cell division*: Even after the number of proteins in a cell reaches the steady state, the cell con-  
304 tinues to grow. The growth stops only after the cell reaches a critical size. At this point the  
305 cell divides into two daughter cells. The content of the mother cell is distributed among her  
306 daughters according to a uniform distribution. In reality and in the presence of active trans-  
307 portation, one can still expect a uniform distribution of molecules in the cytoplasm (*Huh and*  
308 *Paulsson, 2011*), making this assumption biologically reasonable. The position at which cell  
309 division occurs is randomly chosen based on a normal distribution (component #2). At the  
310 time of birth, the phenotype of each newborn cell is determined based on the cytoplasmic  
311 contents (number of key proteins,  $X$ , and  $Y$  at the time of birth) inherited from the mother  
312 cell (component #3). During the cell growth, the number of each protein has a stochastic tra-  
313 jectory in the domain of its attractor and finally it will reach its steady state. In this model,  
314 phenotypic change is reversible, meaning that the phenotype can change between the two  
315 possible states over generations. Since in our simulations, daughter cells have similar vol-  
316 umes, we consider the number of proteins distributed between them, and not their concen-  
317 trations.
- 318 3. *Relaxation*: After a cell divides, the cells push each other outwards to make room for the new  
319 daughter cells (*Kreft et al., 2001*). Simulation proceeds by repeating the steps #1-3. It is worth  
320 noting that, without considering self-organization, the process described above would result  
321 in a disordered blob of cells.
- 322 4. *Self-organization*: To involve the self-organization phenomenon in the process of cell matura-  
323 tion (component #8), cells secrete some signaling molecules, with concentration  $C_s$ , which af-  
324 fects the propensities in the Gillespie algorithm and, consequently, the production of proteins.  
325 The signaling molecules diffuse in the medium according to the following reaction-diffusion  
326 equation:

$$\frac{\partial C_s}{\partial t} = D_s \nabla^2 C_s + k_{sp} C_B - k_{sc} \frac{C_s}{K_s + C_s} (C_A + C_B) - k_{sd} C_s \quad . \quad (2)$$

327 Here,  $k_{sp}$ ,  $k_{sc}$  and  $k_{sd}$  represent, respectively, the rate of production, consumption and decay  
328 of the signaling molecules and  $D_s$  is the diffusion coefficient of the signaling molecules.  $C_A$   
329 and  $C_B$  respectively show the number of cells with phenotype A and B at each point of the  
330 medium. In our simulations, we used  $D_s = 10^{-11} m^2/s$ ,  $k_{sp} = 0.01 kg^{-1} s^{-1}$ ,  $k_{sc} = 0.0001 kg^{-1} s^{-1}$ ,  
331  $k_{sd} = 0.01 s^{-1}$ , and  $K_s = 0.01 m^{-3}$ .

332 In these simulations, the secreting cells are those with phenotype B; hence, the production of  
333 signaling molecules is proportional to the amount of B cells. Since both phenotypes consume  
334 these molecules, the consumption depends on the number of both A and B cells. When  
335 B cells emerge, they secrete signaling molecules, which diffuse in their environment. The

336 minimum effective concentration of the signaling molecules at any location determines if a  
337 cell at that location is affected by the signal, which would decrease the production of protein  
338  $X$  and augment the production of protein  $Y$ . Consequently, their surrounding cells would  
339 have less chance of producing protein  $X$  and their offspring is less likely to be in the domain  
340 of attraction of protein  $X$ .

### 341 **Code availability**

342 The software used to run all simulations was Matlab 2016 and the scripts are available at [https://](https://github.com/hasafdari/Noise_Driven_Cell_Differentiation)  
343 [github.com/hasafdari/Noise\\_Driven\\_Cell\\_Differentiation](https://github.com/hasafdari/Noise_Driven_Cell_Differentiation) (doi: <https://doi.org/10.5281/zenodo.1227287>).

### 344 **Acknowledgments**

345 We had helpful discussions with Hamid Pezeshk and Amir Malekpour. Elahe Elahi, Steffen Rulands,  
346 Ricardo B. R. Azevedo, and Gábor Balázsi provided useful comments on the manuscript.

### 347 **Author contribution**

348 MS designed research; RT and BG contributed to the initial idea; AK wrote the manuscript; HS  
349 and CP contributed to the methods section; MS and AK contributed to the introduction and the  
350 discussion; HS analyzed the data; HS and AK visualized the results. All authors read and approved  
351 the final manuscript.

### 352 **Funding**

353 This research did not receive any specific grant from funding agencies in the public, commercial,  
354 or not-for-profit sectors.

### 355 **Additional information**

356 The authors declare no competing interests.

### 357 **References**

- 358 **Allen B**, Gore J, Nowak M. Spatial dilemmas of diffusible public goods. *eLife*. 2013; 2(0):e01169. doi:  
359 [10.7554/eLife.01169](https://doi.org/10.7554/eLife.01169).
- 360 **Axelrod K**, Sanchez A, Gore J. Phenotypic states become increasingly sensitive to perturbations near a bifurca-  
361 tion in a synthetic gene network. *eLife*. 2015; 4:e07935. doi: [10.7554/eLife.07935](https://doi.org/10.7554/eLife.07935).
- 362 **Balázsi G**, van Oudenaarden A, Collins JJ. Cellular Decision Making and Biological Noise: From Microbes to  
363 Mammals. *Cell*. 2011; 144(6):910–925. doi: [10.1016/j.cell.2011.01.030](https://doi.org/10.1016/j.cell.2011.01.030).
- 364 **Betschinger J**, Knoblich JA. Dare to Be Different: Asymmetric Cell Division in *Drosophila*, *C.elegans* and Verte-  
365 brates. *Curr Biol*. 2017 2017/06/07; 14(16):R674–R685. doi: [10.1016/j.cub.2004.08.017](https://doi.org/10.1016/j.cub.2004.08.017).
- 366 **Bradshaw N**, Losick R. Asymmetric division triggers cell-specific gene expression through coupled capture and  
367 stabilization of a phosphatase. *eLife*. 2015; 4:e08145. doi: [10.7554/eLife.08145](https://doi.org/10.7554/eLife.08145).
- 368 **Bumke MA**, Neri D, Elia G. Modulation of gene expression by extracellular pH variations in human fibroblasts:  
369 A transcriptomic and proteomic study. *Proteomics*. 2003; 3(5):675–688. doi: [10.1002/pmic.200300395](https://doi.org/10.1002/pmic.200300395).
- 370 **Carson E**, Cobelli C. *Modelling Methodology for Physiology and Medicine*. Academic Press; 2000.
- 371 **Chalancon G**, Ravarani C, Balaji S, Alfonso M, Aravind L, Jothi R, Babu M. Interplay between gene  
372 expression noise and regulatory network architecture. *Trends Genet*. 2012; 28(5):221–232. doi:  
373 [10.1016/j.tig.2012.01.006](https://doi.org/10.1016/j.tig.2012.01.006).
- 374 **Chang HH**, Hemberg M, Barahona M, Ingber DE, Huang S. Transcriptome-wide noise controls lineage choice  
375 in mammalian progenitor cells. *Nature*. 2008 05; 453(7194):544–547.
- 376 **Clevers H**. Stem cells, asymmetric division and cancer. *Nat Genet*. 2005 10; 37(10):1027–1028.

- 377 **Cortes MG**, Trinh JT, Zeng L, Balázsi G. Late-Arriving Signals Contribute Less to Cell-Fate Deci-  
378 sions. *Biophys J*. 2018 2018/04/13; 113(9):2110–2120. <http://dx.doi.org/10.1016/j.bpj.2017.09.012>, doi:  
379 [10.1016/j.bpj.2017.09.012](https://doi.org/10.1016/j.bpj.2017.09.012).
- 380 **Dennett DC**. *Intuition Pumps And Other Tools for Thinking*. W. W. Norton & Company; 2014.
- 381 **Donlan RM**. Biofilms: Microbial Life on Surfaces. *Emerg Infect Diseases*. 2002; 8(9):881 – 889.
- 382 **Elowitz MB**, Levine AJ, Siggia ED, Swain PS. Stochastic Gene Expression in a Single Cell. *Science*. 2002 08;  
383 297(5584):1183.
- 384 **Elowitz MB**, Stanislas L. A synthetic oscillatory network of transcriptional regulators. *Nature*. 2000 01;  
385 403(1038):1183.
- 386 **Fisher RA**. *The Genetical Theory of Natural Selection*. Oxford University Press; 1930.
- 387 **Gardner A**, Kalinka AT. Recombination and the evolution of mutational robustness. *J Theor Biol*. 2006;  
388 241(4):707–715.
- 389 **Gardner TS**, Cantor CR, Collins JJ. Construction of a genetic toggle switch in *Escherichia coli*. *Nature*. 2000 01;  
390 403(1038):1183.
- 391 **van Gestel J**, Vlamakis H, Kolter R. Division of Labor in Biofilms: the Ecology of Cell Differentiation. *Microbiol*  
392 *Spectr*. 2015; 3(2).
- 393 **Ghaffarizadeh A**, Flann N, Podgorski G. Multistable switches and their role in cellular differentiation networks.  
394 *BMC Bioinformatics*. 2014; 15(S7):1–13. doi: [10.1186/1471-2105-15-S7-S7](https://doi.org/10.1186/1471-2105-15-S7-S7).
- 395 **Gillespie DT**. Exact stochastic simulation of coupled chemical reactions. *J Phys Chem*. 1977 12; 81(25):2340–  
396 2361. doi: [10.1021/j100540a008](https://doi.org/10.1021/j100540a008).
- 397 **Hooshangi S**, Bentley WE. LsrR Quorum Sensing “Switch” Is Revealed by a Bottom-Up Approach. *PLOS Comput*  
398 *Biol*. 2011 09; 7(9):1–11. <https://doi.org/10.1371/journal.pcbi.1002172>, doi: [10.1371/journal.pcbi.1002172](https://doi.org/10.1371/journal.pcbi.1002172).
- 399 **Huang S**. Non-genetic heterogeneity of cells in development: more than just noise. *Development*. 2009;  
400 136(23):3853–3862. doi: [10.1242/dev.035139](https://doi.org/10.1242/dev.035139).
- 401 **Huh D**, Paulsson J. Non-genetic heterogeneity from stochastic partitioning at cell division. *Nat Genet*. 2010;  
402 43(2):95–100. doi: [10.1038/ng.729](https://doi.org/10.1038/ng.729).
- 403 **Huh D**, Paulsson J. Random partitioning of molecules at cell division. *PNAS*. 2011; 108(36):15004–15009. doi:  
404 [10.1073/pnas.1013171108](https://doi.org/10.1073/pnas.1013171108).
- 405 **Jan YN**, Jan LY. Asymmetric cell division. *Nature*. 1998 04; 392:775 EP –. <http://dx.doi.org/10.1038/33854>.
- 406 **Kepler TB**, Elston TC. Stochasticity in Transcriptional Regulation: Origins, Consequences, and Mathematical  
407 Representations. *Biophys J*. 2001; 81(6):3116–3136. doi: [http://dx.doi.org/10.1016/S0006-3495\(01\)75949-8](http://dx.doi.org/10.1016/S0006-3495(01)75949-8).
- 408 **Kimura M**. On the evolutionary adjustment of spontaneous mutation rates. *Genet Res*. 1967; 9(1):23–34. doi:  
409 [10.1017/S0016672300010284](https://doi.org/10.1017/S0016672300010284).
- 410 **Kirk DL**. *Volvox* : molecular genetic origins of multicellularity and cellular differentiation. New York: Cambridge  
411 University Press; 1998.
- 412 **Kittisopikul M**, Süel GM. Biological role of noise encoded in a genetic network motif. *PNAS*. 2010 07;  
413 107(30):13300–13305.
- 414 **Kreft JU**, Booth G, Wimpenny JWT. BacSim, a simulator for individual-based modelling of bacterial colony  
415 growth. *Microbiology*. 1998; 144(12):3275–3287.
- 416 **Kreft JU**, Picioreanu C, Wimpenny JWT, van Loosdrecht MCM. Individual-based modelling of biofilms. *Microbi-*  
417 *ology*. 2001; 147(11):2897–2912.
- 418 **Kupiec JJ**. A Darwinian theory for the origin of cellular differentiation. *Mol Gen Genet*. 1997; 255(2):201–208.  
419 <https://doi.org/10.1007/s004380050490>, doi: [10.1007/s004380050490](https://doi.org/10.1007/s004380050490).
- 420 **Lee C**, Brangwynne C, Gharakhani J, Hyman A, Jülicher F. Spatial Organization of the Cell Cytoplasm by Position-  
421 Dependent Phase Separation. *Phys Rev Lett*. 2013; 111(8). doi: [10.1103/PhysRevLett.111.088101](https://doi.org/10.1103/PhysRevLett.111.088101).

- 422 **Lo M**, Bulach DM, Powell DR, Haake DA, Matsunaga J, Paustian ML, Zuerner RL, Adler B. Effects of Temper-  
423 ature on Gene Expression Patterns in *Leptospira interrogans* Serovar Lai as Assessed by Whole-Genome  
424 Microarrays. *Infect Immun*. 2006 10; 74(10):5848–5859. doi: [10.1128/IAI.00755-06](https://doi.org/10.1128/IAI.00755-06).
- 425 **Losick R**, Desplan C. Stochasticity and cell fate. *Science*. 2008; 320(5872):65–68.
- 426 **Lynch M**, Ackerman MS, Gout JF, Long H, Sung W, Thomas WK, Foster PL. Genetic drift, selection and the  
427 evolution of the mutation rate. *Nat Rev Genet*. 2016 11; 17(11):704–714.
- 428 **Maamar H**, Raj A, Dubnau D. Noise in Gene Expression Determines Cell Fate in *Bacillus subtilis*. *Science*. 2007;  
429 317(5837):526–529. doi: [10.1126/science.1140818](https://doi.org/10.1126/science.1140818).
- 430 **of Malmesbury TH**. *Leviathan or The Matter, Forme and Power of a Common Wealth Ecclesiasticall and Civil*.  
431 London: Andrew Crooke; 1651.
- 432 **Margolin W**. Themes and variations in prokaryotic cell division. *FEMS Microbiol Rev*. 2000; .
- 433 **Maynard Smith J**, Szathmáry E. *The Major Transition in Evolution*. New York: Oxford University Press; 1995.
- 434 **McDonald JH**, Kreitman M. Adaptive protein evolution at the Adh locus in *Drosophila*. *Nature*. 1991 06;  
435 351(6328):652–654.
- 436 **Monahan L**, Liew A, Bottomley A, Harry E. Division site positioning in bacteria: one size does not fit all. *Front*  
437 *Microbiol*. 2014; 5:19. doi: [10.3389/fmicb.2014.00019](https://doi.org/10.3389/fmicb.2014.00019).
- 438 **Morrison SJ**, Kimble J. Asymmetric and symmetric stem-cell divisions in development and cancer. *Nature*. 2006  
439 06; 441(7097):1068–1074.
- 440 **Moussy A**, Cosette J, Parmentier R, da Silva C, Corre G, Richard A, Gandrillon O, Stockholm D, Páldi A. Inte-  
441 grated time-lapse and single-cell transcription studies highlight the variable and dynamic nature of human  
442 hematopoietic cell fate commitment. *PLOS Biology*. 2017 07; 15(7):e2001867-. [https://doi.org/10.1371/  
443 journal.pbio.2001867](https://doi.org/10.1371/journal.pbio.2001867).
- 444 **Mustonen M**, Haimi J, Kesäniemi J, Högmander H, Knott KE. Variation in gene expression within clones of the  
445 earthworm *Dendrobaena octaedra*. *PLOS ONE*. 2017 04; 12(4):1–16. doi: [10.1371/journal.pone.0174960](https://doi.org/10.1371/journal.pone.0174960).
- 446 **Nadell CD**, Xavier JB, Foster KR. The sociobiology of biofilms. *FEMS Microbiol Rev*. 2009; 33(1):206–24. doi:  
447 [10.1111/j.1574-6976.2008.00150.x](https://doi.org/10.1111/j.1574-6976.2008.00150.x).
- 448 **Nanjundiah V**. Cellular Slime Mold Development as a Paradigm for the Transition from Unicellular to Multicel-  
449 lular Life. In: Niklas KJ, Newman SA, editors. *Multicellularity: Origins and Evolution* Cambridge, Massachusetts:  
450 The MIT Press; 2016.p. 105–130.
- 451 **Neildez-Nguyen TMA**, Parisot A, Vignal C, Rameau P, Stockholm D, Picot J, Allo V, Le Bec C, Laplace C,  
452 Paldi A. Epigenetic gene expression noise and phenotypic diversification of clonal cell populations. *Dif-*  
453 *ferentiation*. 2008; 76(1):33–40. <http://www.sciencedirect.com/science/article/pii/S0301468109600505>, doi:  
454 <https://doi.org/10.1111/j.1432-0436.2007.00219.x>.
- 455 **Novick A**, Weiner M. Enzyme induction as an all-or-none phenomenon. *PNAS*. 1957 07; 43(7):553–566. [http:  
456 //www.ncbi.nlm.nih.gov/pmc/articles/PMC528498/](http://www.ncbi.nlm.nih.gov/pmc/articles/PMC528498/).
- 457 **Ostrowski EA**, Shaulsky G. Learning to get along despite struggling to get by. *Genome Biol*. 2009; 10(5):218.  
458 doi: [10.1186/gb-2009-10-5-218](https://doi.org/10.1186/gb-2009-10-5-218).
- 459 **Ozbudak EM**, Thattai M, Kurtser I, Grossman AD, van Oudenaarden A. Regulation of noise in the expression  
460 of a single gene. *Nat Genet*. 2002 05; 31(1):69–73.
- 461 **Paldi A**. Stochastic gene expression during cell differentiation: order from disorder? *Cell Mol Life Sci*. 2003;  
462 60(9):1775–1778. <https://doi.org/10.1007/s00018-003-23147-z>, doi: [10.1007/s00018-003-23147-z](https://doi.org/10.1007/s00018-003-23147-z).
- 463 **Paliwal S**, Iglesias PA, Campbell K, Hilioti Z, Groisman A, Levchenko A. MAPK-mediated bimodal gene expression  
464 and adaptive gradient sensing in yeast. *Nature*. 2007 03; 446(7131):46–51.
- 465 **Perez-Carrasco R**, Guerrero P, Briscoe J, Page KM. Intrinsic Noise Profoundly Alters the Dynamics and Steady  
466 State of Morphogen-Controlled Bistable Genetic Switches. *PLOS Comput Biol*. 2016 10; 12(10):1–23. doi:  
467 [10.1371/journal.pcbi.1005154](https://doi.org/10.1371/journal.pcbi.1005154).



- 468 **Picioreanu C**, Kreft JU, Van Loosdrecht MCM. Particle-based multidimensional multispecies biofilm model.  
469 *Appl Environ Microbiol.* 2004 May; 70(5):3024–3040.
- 470 **Pickett-Heaps JD**, Gunning BE, Brown RC, Lemmon BE, Cleary AL. The cytoplasm concept in dividing plant cells:  
471 cytoplasmic domains and the evolution of spatially organized cell division. *Am J Bot.* 1999; .
- 472 **Ptashne M**. *A Genetic Switch: Phage Lambda Revisited*. Cold Spring Harbor Laboratory Press; 2004.
- 473 **Queller DC**, Strassmann JE. Beyond society: the evolution of organismality. *Philos Trans R Soc Lond B Biol Sci.*  
474 2009 10; 364(1533):3143.
- 475 **Rudel D**, Sommer RJ. The evolution of developmental mechanisms. *Dev Biol.* 2003; 264(1):15–37. doi:  
476 [http://dx.doi.org/10.1016/S0012-1606\(03\)00353-1](http://dx.doi.org/10.1016/S0012-1606(03)00353-1).
- 477 **Sanchez A**, Golding I. Genetic determinants and cellular constraints in noisy gene expression. *Science.* 2013  
478 12; 342(6163):1188–1193. doi: [10.1126/science.1242975](https://doi.org/10.1126/science.1242975).
- 479 **Schluter J**, Schoech AP, Foster KR, Mitri S. The Evolution of Quorum Sensing as a Mechanism to Infer Kin-  
480 ship. *PLOS Comput Biol.* 2016 04; 12(4):1–18. <https://doi.org/10.1371/journal.pcbi.1004848>, doi: [10.1371/jour-](https://doi.org/10.1371/journal.pcbi.1004848)  
481 [nal.pcbi.1004848](https://doi.org/10.1371/journal.pcbi.1004848).
- 482 **Sharifi-Zarchi A**, Totonchi M, Khaloughi K, Karamzadeh R, Araúzo-Bravo MJ, Baharvand H, Tusserkani R,  
483 Pezeshk H, Chitsaz H, Sadeghi M. Increased robustness of early embryogenesis through collective decision-  
484 making by key transcription factors. *BMC Syst Biol.* 2015; 9(1):23. doi: [10.1186/s12918-015-0169-8](https://doi.org/10.1186/s12918-015-0169-8).
- 485 **Shea MA**, Ackers GK. The OR control system of bacteriophage lambda. *Journal of Molecular Biology.* 1985;  
486 181(2):211 – 230. doi: [http://dx.doi.org/10.1016/0022-2836\(85\)90086-5](http://dx.doi.org/10.1016/0022-2836(85)90086-5).
- 487 **Suzuki N**, Furusawa C, Kaneko K. Oscillatory Protein Expression Dynamics Endows Stem Cells with Robust  
488 Differentiation Potential. *PLOS ONE.* 2011 11; 6(11):e27232–.
- 489 **Vogt G**. Stochastic developmental variation, an epigenetic source of phenotypic diversity with far-reaching  
490 biological consequences. *J Biosci.* 2015 Mar; 40(1):159–204.
- 491 **Wolk PC**. Heterocyst formation. *Annu Rev Genet.* 1996; 30:59–78.
- 492 **Wolpert L**. Positional information and patterning revisited. *J Theor Biol.* 2011; 269(1):359–365. doi:  
493 <http://dx.doi.org/10.1016/j.jtbi.2010.10.034>.
- 494 **Wu J**, Tzanakakis E. Contribution of Stochastic Partitioning at Human Embryonic Stem Cell Division to NANOG  
495 Heterogeneity. *PLOS ONE.* 2012; 7(11):e50715. doi: [10.1371/journal.pone.0050715](https://doi.org/10.1371/journal.pone.0050715).
- 496 **Xavier JB**, Picioreanu C, van Loosdrecht MCM. A framework for multidimensional modelling of activity and  
497 structure of multispecies biofilms. *Environ Microbiol.* 2005 Aug; 7(8):1085–1103. doi: [10.1111/j.1462-](https://doi.org/10.1111/j.1462-2920.2005.00787.x)  
498 [2920.2005.00787.x](https://doi.org/10.1111/j.1462-2920.2005.00787.x).
- 499 **Xavier JdB**, Picioreanu C, van Loosdrecht MCM. A general description of detachment for multidimensional  
500 modelling of biofilms. *Biotechnol Bioeng.* 2005 Sep; 91(6):651–669. doi: [10.1002/bit.20544](https://doi.org/10.1002/bit.20544).
- 501 **Yamagishi JF**, Saito N, Kaneko K. Symbiotic Cell Differentiation and Cooperative Growth in Multicellular  
502 Aggregates. *PLOS Comput Biol.* 2016 10; 12(10):1–17. <https://doi.org/10.1371/journal.pcbi.1005042>, doi:  
503 [10.1371/journal.pcbi.1005042](https://doi.org/10.1371/journal.pcbi.1005042).

## 504 Appendix 1

### 505 Movies

506 **Movie S1:** The change in the distribution of TFs within cells just before they they divide.  
507 Parameters used are the same as Fig 1.

508  
509 Movie S2 and Movie S3 show 3-dimensional simulations of a community of cells in a layer.  
510 Simulation performed in a  $L \times L \times h$  cube and starts with one cell at the centre. The cells  
511 grow in volume; after reaching a critical volume they divide and the same as two dimensional  
512 case, their cytoplasmic content distributes between the two daughter cells.

513  
514 **Movie S2:** The emergence of heterogeneity in the population of cells as a result of the pres-  
515 ence of noise in the process of cell growth and division. The average amount of TFs in each  
516 cell at steady state is 25. The simulation started by one cell and continues over 13 genera-  
517 tions,  $L = 130\mu\text{m}$  and  $h = 1.33\mu\text{m}$ . Since there is a single layer of cells,  $h$  corresponds to the  
518 diameter of a single cell.

519  
520 **Movie S3:** The formation of a spatial organization as a result of the secretion of signaling  
521 molecules, which diffuse in their environment and affect the differentiation of the cells. The  
522 average amount of TFs in each cell at steady state = 25. The simulation started by one cell  
523 and continues over 13 generations,  $L = 130\mu\text{m}$  and  $h = 1.33\mu\text{m}$ .

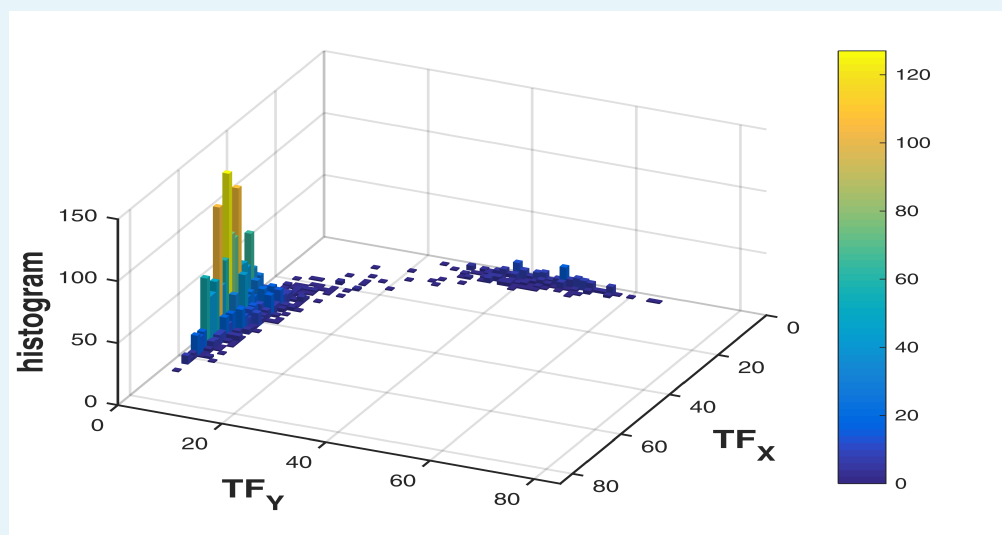

524  
525  
526  
528 **Appendix 1 Figure 1.** The final frame of Movie S1

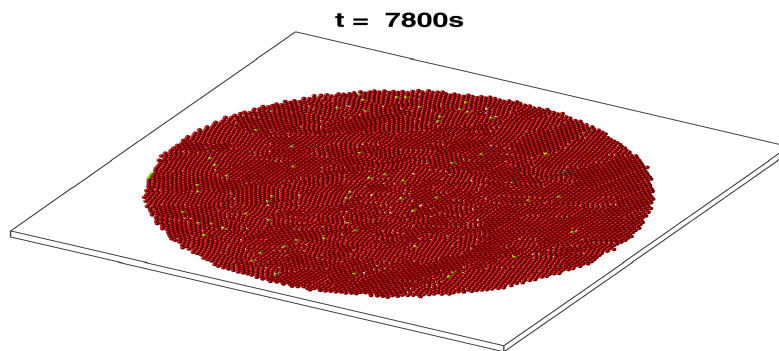

529

530

531

533

**Appendix 1 Figure 2.** The final frame of Movie S2

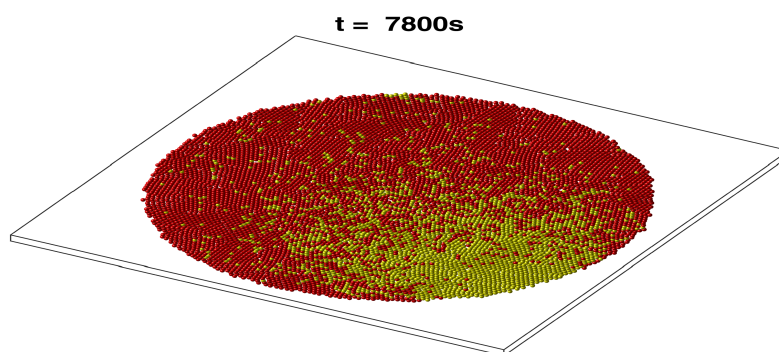

534

535

536

538

**Appendix 1 Figure 3.** The final frame of Movie S3
